# Supplementary material for: BALB/c mice infected with DENV-2 strain 66985 by the intravenous route display injury in the central nervous system
Source: PubMed Central journal article supplement (PMC6021404; doi:10.1038/s41598-018-28137-y), 2018-06-27
Supplement: 41598_2018_28137_MOESM1_ESM.pdf [file 41598_2018_28137_MOESM1_ESM.pdf]

## 2<sup>nd</sup> d.p.i.

| Hemorrhage |         |         |         | Perivascular infiltrate |         |         |         | Pia mater infiltrate |         |         |         |
|------------|---------|---------|---------|-------------------------|---------|---------|---------|----------------------|---------|---------|---------|
| animal1    | animal2 | animal3 | animal4 | animal1                 | animal2 | animal3 | animal4 | animal1              | animal2 | animal3 | animal4 |
| 0          | 0       | 0       | 0       | 0                       | 1       | 3       | 0       | 0                    | 0       | 0       | 0       |
| 0          | 0       | 0       | 0       | 0                       | 0       | 0       | 0       | 0                    | 0       | 0       | 0       |
| 0          | 0       | 0       | 0       | 0                       | 0       | 0       | 0       | 0                    | 0       | 0       | 0       |
| 0          | 0       | 0       | 0       | 1                       | 1       | 0       | 1       | 0                    | 0       | 0       | 0       |
| 0          | 0       | 0       | 0       | 0                       | 0       | 0       | 0       | 1                    | 0       | 0       | 2       |
| 0          | 0       | 0       | 0       | 1                       | 0       | 1       | 0       | 0                    | 0       | 0       | 0       |
| 0          | 0       | 0       | 0       | 1                       | 0       | 0       | 0       | 0                    | 0       | 0       | 0       |
| 0          | 0       | 0       | 0       | 0                       | 0       | 0       | 0       | 1                    | 1       | 2       | 0       |
| 0          | 0       | 0       | 1       | 0                       | 2       | 0       | 0       | 0                    | 0       | 0       | 0       |
| 0          | 0       | 0       | 0       | 0                       | 0       | 0       | 0       | 0                    | 0       | 0       | 0       |
| 0          | 0       | 0       | 0       | 0                       | 2       | 0       | 0       | 0                    | 0       | 0       | 0       |
| 1          | 0       | 0       | 0       | 0                       | 0       | 4       | 0       | 0                    | 0       | 0       | 0       |
| 0          | 0       | 0       | 2       | 0                       | 0       | 3       | 2       | 0                    | 0       | 0       | 1       |
| 0          | 0       | 0       | 0       | 0                       | 0       | 3       | 0       | 1                    | 0       | 0       | 0       |
| 0          | 0       | 0       | 0       | 0                       | 0       | 3       | 0       | 0                    | 0       | 0       | 0       |
| 0          | 1       | 0       | 0       | 0                       | 0       | 2       | 1       | 0                    | 0       | 0       | 0       |
| 0          | 0       | 0       | 0       | 0                       | 0       | 0       | 1       | 0                    | 0       | 0       | 0       |
| 0          | 0       | 0       | 0       | 0                       | 0       | 0       | 0       | 0                    | 0       | 0       | 1       |
| 0          | 0       | 0       | 0       | 0                       | 0       | 0       | 0       | 1                    | 0       | 0       | 0       |
| 0          | 0       | 0       | 1       | 0                       | 0       | 0       | 0       | 1                    | 0       | 0       | 0       |
| 0          | 0       | 0       | 0       | 0                       | 0       | 0       | 0       | 0                    | 0       | 0       | 0       |
| 0          | 0       | 0       | 0       | 0                       | 0       | 0       | 0       | 0                    | 0       | 0       | 0       |
| 0          | 0       | 0       | 0       | 0                       | 0       | 0       | 0       | 0                    | 0       | 0       | 0       |
| 0          | 1       | 0       | 0       | 0                       | 0       | 0       | 1       | 0                    | 0       | 1       | 0       |
| 0          | 1       | 0       | 0       | 0                       | 1       | 0       | 0       | 0                    | 0       | 0       | 0       |
| 0          | 0       | 0       | 0       | 0                       | 0       | 0       | 0       | 0                    | 0       | 0       | 0       |
| 0          | 0       | 0       | 0       | 0                       | 0       | 0       | 1       | 2                    | 0       | 0       | 0       |
| 0          | 0       | 0       | 0       | 0                       | 0       | 0       | 0       | 0                    | 0       | 0       | 0       |
| 0          | 0       | 0       | 0       | 0                       | 0       | 1       | 0       | 0                    | 0       | 0       | 0       |
| 0          | 0       | 0       | 0       | 0                       | 0       | 1       | 1       | 0                    | 0       | 0       | 0       |

## 7<sup>th</sup> d.p.i.

| Hemorrhage |         |         |         | Perivascular infiltrate |         |         |         | Pia mater infiltrate |         |         |         |
|------------|---------|---------|---------|-------------------------|---------|---------|---------|----------------------|---------|---------|---------|
| animal1    | animal2 | animal3 | animal4 | animal1                 | animal2 | animal3 | animal4 | animal1              | animal2 | animal3 | animal4 |
| 0          | 0       | 0       | 0       | 1                       | 0       | 1       | 0       | 1                    | 1       | 1       | 0       |
| 0          | 0       | 0       | 0       | 0                       | 0       | 0       | 0       | 1                    | 0       | 0       | 2       |
| 0          | 0       | 3       | 0       | 0                       | 0       | 2       | 1       | 0                    | 0       | 0       | 0       |
| 0          | 3       | 0       | 0       | 1                       | 0       | 0       | 4       | 0                    | 1       | 0       | 0       |
| 0          | 0       | 0       | 0       | 0                       | 0       | 0       | 0       | 0                    | 2       | 0       | 1       |
| 0          | 0       | 0       | 0       | 0                       | 2       | 0       | 0       | 0                    | 0       | 0       | 0       |
| 0          | 0       | 1       | 0       | 0                       | 1       | 1       | 0       | 0                    | 0       | 0       | 0       |
| 1          | 0       | 2       | 0       | 0                       | 0       | 0       | 0       | 1                    | 0       | 2       | 0       |
| 0          | 2       | 0       | 0       | 0                       | 0       | 3       | 3       | 0                    | 0       | 0       | 0       |
| 0          | 0       | 0       | 0       | 0                       | 0       | 0       | 0       | 0                    | 0       | 0       | 0       |
| 0          | 0       | 0       | 1       | 0                       | 0       | 3       | 0       | 0                    | 0       | 0       | 1       |
| 0          | 0       | 0       | 0       | 4                       | 0       | 0       | 0       | 0                    | 0       | 1       | 1       |
| 0          | 0       | 0       | 0       | 0                       | 1       | 0       | 0       | 0                    | 0       | 0       | 1       |
| 0          | 0       | 0       | 0       | 0                       | 1       | 4       | 0       | 0                    | 0       | 1       | 0       |
| 0          | 0       | 0       | 1       | 1                       | 0       | 0       | 0       | 0                    | 0       | 0       | 0       |
| 0          | 0       | 1       | 0       | 0                       | 3       | 0       | 2       | 1                    | 0       | 0       | 2       |
| 0          | 0       | 0       | 0       | 0                       | 2       | 0       | 0       | 0                    | 1       | 1       | 1       |
| 0          | 0       | 0       | 0       | 2                       | 1       | 2       | 3       | 0                    | 0       | 0       | 0       |
| 0          | 0       | 0       | 0       | 0                       | 0       | 0       | 3       | 0                    | 0       | 0       | 0       |
| 0          | 0       | 0       | 0       | 0                       | 0       | 0       | 1       | 0                    | 0       | 0       | 2       |
| 0          | 0       | 0       | 0       | 0                       | 0       | 0       | 0       | 2                    | 0       | 0       | 0       |
| 0          | 0       | 1       | 0       | 0                       | 0       | 1       | 2       | 0                    | 0       | 0       | 0       |
| 0          | 2       | 0       | 0       | 1                       | 0       | 0       | 0       | 0                    | 0       | 0       | 0       |
| 0          | 0       | 2       | 0       | 1                       | 1       | 0       | 2       | 0                    | 0       | 0       | 0       |
| 2          | 0       | 0       | 0       | 1                       | 0       | 2       | 0       | 2                    | 0       | 0       | 0       |
| 0          | 0       | 0       | 0       | 0                       | 0       | 2       | 1       | 0                    | 2       | 0       | 0       |
| 0          | 0       | 1       | 0       | 0                       | 1       | 1       | 2       | 0                    | 0       | 0       | 0       |
| 0          | 0       | 0       | 0       | 3                       | 0       | 0       | 0       | 0                    | 1       | 1       | 0       |
| 0          | 0       | 0       | 1       | 0                       | 0       | 1       | 0       | 0                    | 0       | 0       | 0       |
| 0          | 0       | 1       | 0       | 3                       | 0       | 1       | 0       | 1                    | 0       | 0       | 0       |
